# Supplementary material for: Patterns of selective constraints in noncoding DNA of rice
Source: PubMed Central journal article supplement (PMC2174951; doi:10.1186/1471-2148-7-208), 2007-11-01

Additional Data File1. Synteny of segments from the top arms of chromosome 11 and 12 were shown. Total 272 duplicate gene pairs from the duplicate segments were collected and used in this study.

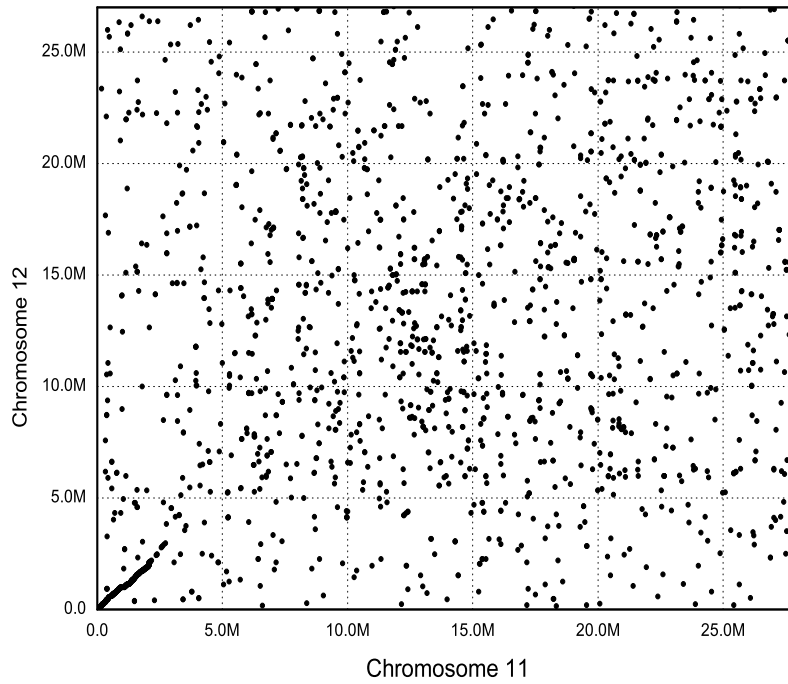

Supplement: 1471-2148-7-208-S1.pdf [file 1471-2148-7-208-S1.pdf]
